# Supplementary material for: Gait Pattern Analysis: Integration of a Highly Sensitive Flexible Pressure Sensor on a Wireless Instrumented Insole
Source: MDPI journal article supplement (doi:10.3390/s24092944), 2024-05-06
Supplement: s1 [file s1]

## **Gait Pattern Analysis: Integration of a Highly Sensitive Flexible Pressure Sensor on Wireless Instrumented Insole**

Partha Sarati Das<sup>1</sup>, Daniella Skaf<sup>2</sup>, Lina Rose<sup>1</sup>, Fatemeh Motaghedi,<sup>2</sup> Tricia Breen Carmichael<sup>2</sup>, Simon Rondeau-Gagné<sup>2\*</sup>, Mohammed Jalal Ahamed<sup>1\*</sup>

<sup>1</sup>Mechanical, Automotive & Materials Engineering, University of Windsor, Ontario, Canada.

<sup>2</sup>Department of Chemistry and Biochemistry, University of Windsor, Ontario, Canada.

\*Corresponding author: Prof. Dr. Mohammed Jalal Ahamed (email:  
jahamed@uwindsor.ca).

### **Supporting Information**

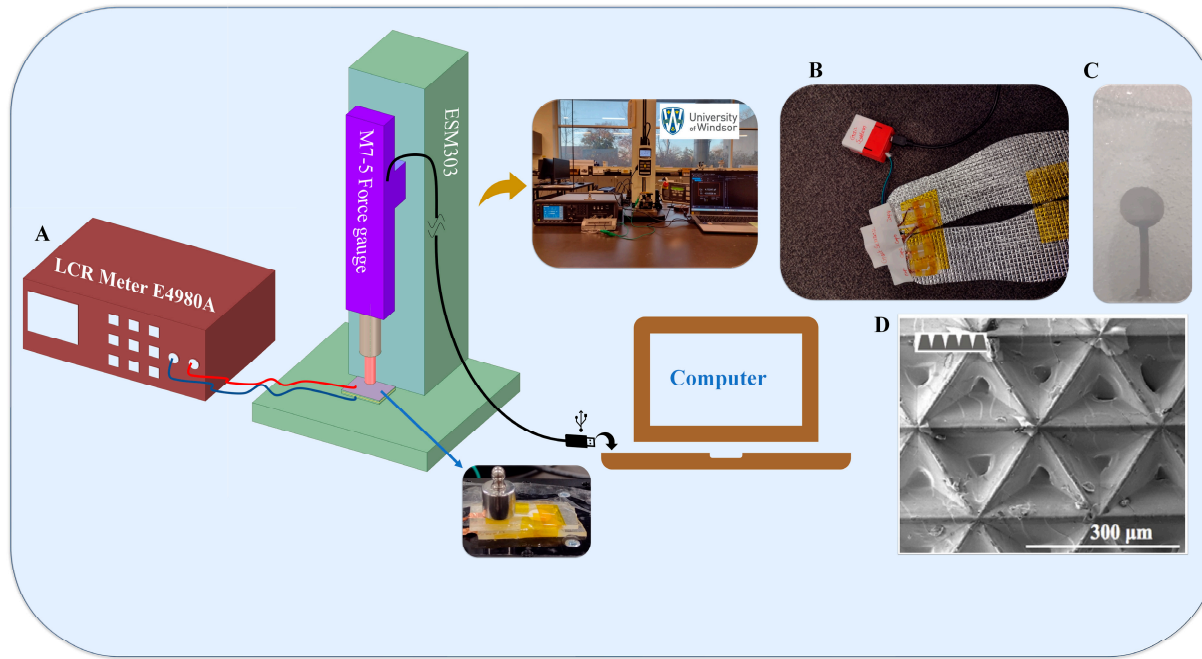

Figure S1. Measurement setup. (A) Setup for the measurement of the sensor response. (B) Photograph of gait signal acquisition using a flexible capacitive pressure sensor. (C) Image of the flexible electrode surface. (D) SEM image of the micropatterned PDMS. The white scale bar represents 300  $\mu\text{m}$ .

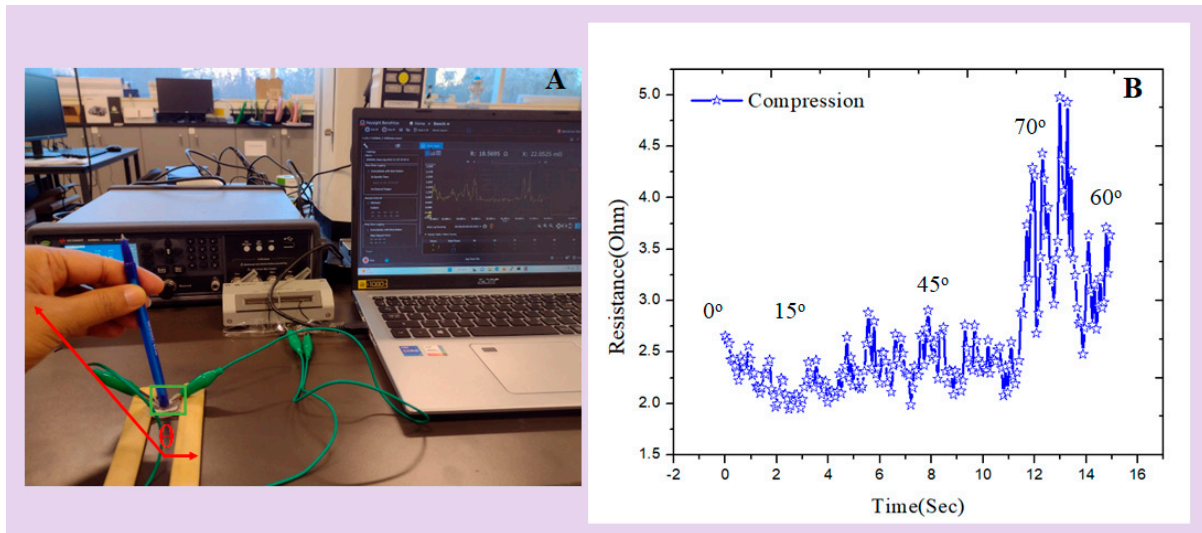

Figure S2. (A) Experimental image of the electrical characterization, (B) Resistance changes of electrodes when bent on PDMS

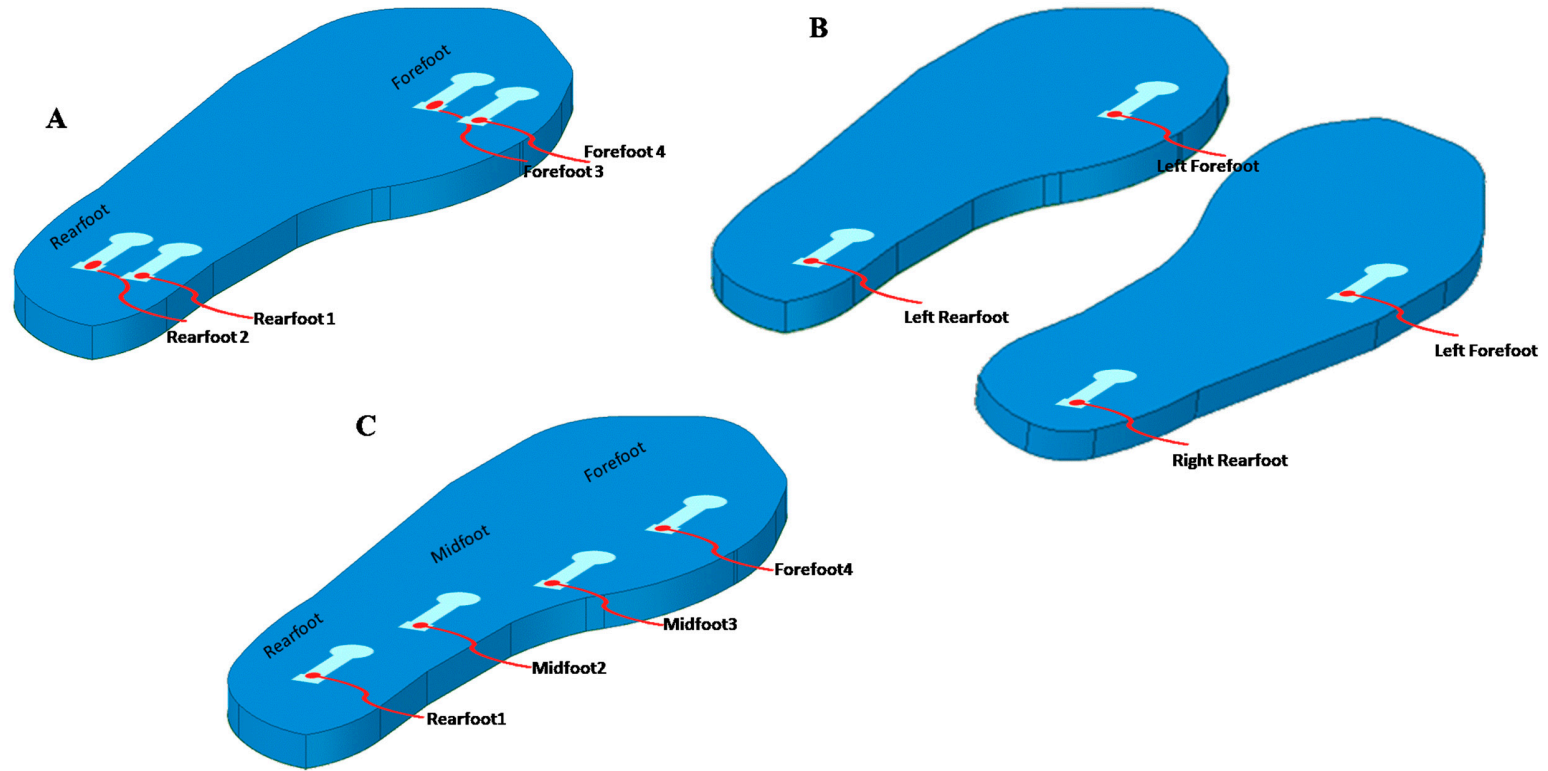

Figure S3. Placement of sensors in different locations. (A) two forefoot and two rearfoot, (B) left and right side(forefoot and rearfoot), (C) one forefoot, two midfoot, and one rearfoot.

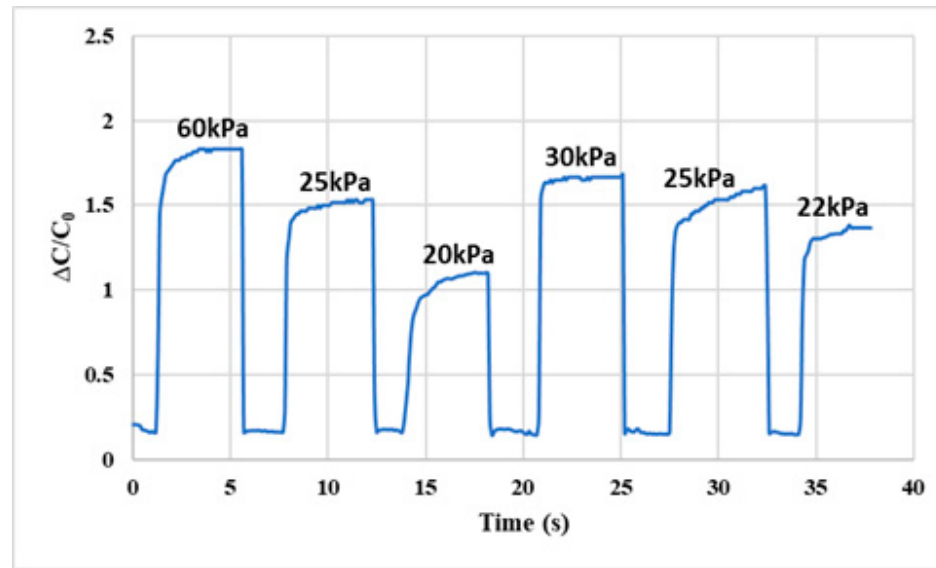

Figure S4. Capacitance changes under different forces.

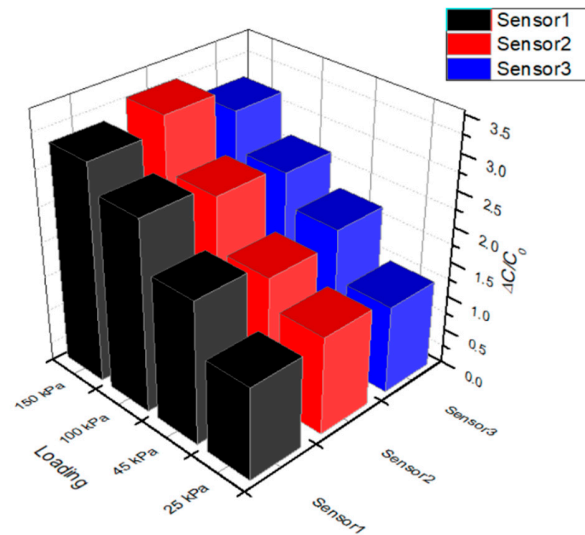

Figure S5. Capacitance changes under different forces for three sensors.

| Table S1. Performance comparison of capacitive pressure sensor for gait monitoring application |                            |                                      |                                        |                |                                                     |                                                                                              |                                                                                                                      |
|------------------------------------------------------------------------------------------------|----------------------------|--------------------------------------|----------------------------------------|----------------|-----------------------------------------------------|----------------------------------------------------------------------------------------------|----------------------------------------------------------------------------------------------------------------------|
| Year                                                                                           | Sensors used               | Sensitivity/Linearity                | Materials                              | No. of Sensors | Location of Sensor                                  | Gait Parameters                                                                              | Sensor Parameters                                                                                                    |
| 2020 [11]                                                                                      | Capacitive pressure sensor | $12 \times 10^{-3} \text{ kPa}^{-1}$ | Ecoflex, Conductive fabric             | 24             | 5 heel, 7 middle, and 12 in forefoot                | Standing postures, yoga asana, walking straight, turning around, falling, and going upstairs | Pore size, sensitivity, linearity, stability                                                                         |
| 2022 [12]                                                                                      | Capacitive pressure sensor | Different under different pressure   | 3D printed, paper based AgNW electrode | 3              | Walking pressure at heel and tiptoe                 | Walking pattern                                                                              | Sensitivity, detection range, stability                                                                              |
| 2022 [13]                                                                                      | Capacitive pressure sensor | $1.19 \pm 0.03 \text{ MPa}^{-1}$     | Filaflex 82A                           | 16             | Calcaneus, plantar arch, metatarsals, and phalanges | Toe off, stance, heel strike, foot flat, midstance, and heel off                             | Dynamic response, sensitivity, linearity, pressure detection range, stability, durability, hysteresis, response time |
| 2022 [14]                                                                                      | Capacitive pressure sensor | $1.314 \text{ MPa}^{-1}$             | TPU, EITPU, Eco flex                   | 4              | 1 Heel, 1 right, 1 left, and 1 toe                  | Steps of walking                                                                             | Linearity, efficiency, durability, sensitivity                                                                       |
| 2022 [16]                                                                                      | Capacitive pressure sensor | 0.953                                | TPU, PDMS, MWCNT, AgNP                 | 5              | Different locations                                 | Sitting, sit-to-stand transition, standing, walking, and turning                             | Sensitivity, hysteresis, and durability                                                                              |
| 2020 [34]                                                                                      | Capacitive pressure sensor |                                      | PCB based                              | 4              | Heel                                                | Heel strike, toe off                                                                         | Specificity and sensibility                                                                                          |
| This Work                                                                                      | Capacitive pressure sensor | Linearity, $R^2=0.96$ , Slope=0.14   | PDMS, screen-printed silver (Ag) paste | 4              | 1 rearfoot, 2 midfoot, 1 forefoot                   | Reverse strike pattern, forward strike pattern, walking                                      | Detection range, response time, relaxation time, Linearity, durability                                               |
